# Supplementary material for: Nrf2 pathway activation promotes the expression of genes related to glutathione metabolism in alcohol-exposed astrocytes
Source: PeerJ. 2024 May 31;12:e17541. doi: 10.7717/peerj.17541 (PMC11146317; doi:10.7717/peerj.17541)
Supplement: Supplemental Information 3 [file peerj-12-17541-s003.xlsx]

## Sheet: TBHQ VS ALC kegg_enrich
<label class="checkAll" style="cursor:pointer;padding-top:2px;"><i class="icon-check-empty" style="margin-right:5px;"></i>Num</label>	First Category	Second Category	Pathway Desciption	Pathway_ID	Database	Ratio_in_pop	P_value	P_adjust
1	Human Diseases	Immune disease	Asthma	map05310	KEGG PATHWAY	5/4096	0.0097	0.0584
1	Human Diseases	Endocrine and metabolic disease	Insulin resistance	map04931	KEGG PATHWAY	19/4096	0.0365	0.1096
1	Metabolism	Nucleotide metabolism	Pyrimidine metabolism	map00240	KEGG PATHWAY	65/4096	0.1202	0.1443
1	Metabolism	Amino acid metabolism	Phenylalanine, tyrosine and tryptophan biosynthesis	map00400	KEGG PATHWAY	34/4096	0.0646	0.1549
1	Metabolism	Amino acid metabolism	Cysteine and methionine metabolism	map00270	KEGG PATHWAY	63/4096	0.1167	0.1556
1	Metabolism	Metabolism of cofactors and vitamins	Folate biosynthesis	map00790	KEGG PATHWAY	57/4096	0.1061	0.1592
1	Metabolism	Biosynthesis of other secondary metabolites	Neomycin, kanamycin and gentamicin biosynthesis	map00524	KEGG PATHWAY	81/4096	0.1478	0.1612
1	Metabolism	Carbohydrate metabolism	Amino sugar and nucleotide sugar metabolism	map00520	KEGG PATHWAY	108/4096	0.1926	0.1926
1	Environmental Information Processing	Signaling molecules and interaction	Neuroactive ligand-receptor interaction	map04080	KEGG PATHWAY	52/4096	0.0972	0.1945
2	Metabolism	Lipid metabolism	Ether lipid metabolism	map00565	KEGG PATHWAY	25/4096	0.001	0.0118
2	Human Diseases	Cancer: overview	Choline metabolism in cancer	map05231	KEGG PATHWAY	11/4096	0.0213	0.0852
2	Metabolism	Lipid metabolism	Glycerophospholipid metabolism	map00564	KEGG PATHWAY	52/4096	0.0972	0.1945
