# Supplementary material for: Nrf2 pathway activation promotes the expression of genes related to glutathione metabolism in alcohol-exposed astrocytes
Source: PeerJ. 2024 May 31;12:e17541. doi: 10.7717/peerj.17541 (PMC11146317; doi:10.7717/peerj.17541)
Supplement: Supplemental Information 4 [file peerj-12-17541-s004.xlsx]

## Sheet: TBHQ VS ALC kegg_enrich_geneset
#Study_num	Term	Database	ID	Ratio_in_study	Ratio_in_pop	P-Value	Corrected P-Value	Genes	Hyperlink	typeII	typeI	Genes_name
5	Glutathione metabolism	KEGG PATHWAY	rno00480	5/32	66/8746	3.61e-06	6.5e-05	ENSRNOG00000013484|ENSRNOG00000018237|ENSRNOG00000014387|ENSRNOG00000030449|ENSRNOG00000000201	http://www.genome.jp/kegg-bin/show_pathway?map=rno00480&multi_query=rno:293656+yellow%0drno:294744+yellow%0drno:299976+yellow%0drno:361596+yellow%0drno:500237+yellow%0drno:29487+yellow%0drno:685579+yellow%0drno:102549803+yellow%0drno:29326+yellow%0drno:171341+yellow%0drno:295037+yellow%0drno:363469+yellow%0drno:24479+yellow%0drno:686922+yellow%0drno:309465+yellow%0drno:113919+yellow%0drno:29328+y…	Metabolism of other amino acids	Metabolism	Gsta1|Gstp1|Chac1|Gsta4|Gsta5
2	Tyrosine metabolism	KEGG PATHWAY	rno00350	2/32	38/8746	0.00839892	0.0755903	ENSRNOG00000015354|ENSRNOG00000032959	http://www.genome.jp/kegg-bin/show_pathway?map=rno00350&multi_query=rno:266603+yellow%0drno:360719+yellow%0drno:25721+yellow%0drno:171178+yellow%0drno:302980+yellow%0drno:681913+yellow%0drno:290484+yellow%0drno:24267+yellow%0drno:81683+yellow%0drno:298182+yellow%0drno:29531+yellow%0drno:29473+yellow%0drno:310903+yellow%0drno:308800+yellow%0drno:54314+yellow%0drno:24813+yellow%0drno:100360621+yell…	Amino acid metabolism	Metabolism	Aox1|Adh7
1	Ubiquinone and other terpenoid-quinone biosynthesis	KEGG PATHWAY	rno00130	1/32	12/8746	0.0430595	0.193768	ENSRNOG00000012772	http://www.genome.jp/kegg-bin/show_pathway?map=rno00130&multi_query=rno:399684+yellow%0drno:498332+yellow%0drno:309004+yellow%0drno:24314+yellow%0drno:299195+yellow%0drno:304542+yellow%0drno:81716+yellow%0drno:25249+yellow%0drno:29531+yellow%0drno:24813+yellow%0drno:103693015+yellow%0drno:29309+yellow%0d	Metabolism of cofactors and vitamins	Metabolism	Nqo1
1	Fructose and mannose metabolism	KEGG PATHWAY	rno00051	1/32	35/8746	0.120625	0.197386	ENSRNOG00000009734	http://www.genome.jp/kegg-bin/show_pathway?map=rno00051&multi_query=rno:60416+yellow%0drno:363145+yellow%0drno:25059+yellow%0drno:302915+yellow%0drno:299052+yellow%0drno:24362+yellow%0drno:25741+yellow%0drno:501167+yellow%0drno:25058+yellow%0drno:117276+yellow%0drno:307848+yellow%0drno:24189+yellow%0drno:24638+yellow%0drno:296972+yellow%0drno:300089+yellow%0drno:116463+yellow%0drno:291095+yellow%…	Carbohydrate metabolism	Metabolism	Akr1b8
1	Nicotinate and nicotinamide metabolism	KEGG PATHWAY	rno00760	1/32	39/8746	0.133478	0.200217	ENSRNOG00000015354	http://www.genome.jp/kegg-bin/show_pathway?map=rno00760&multi_query=rno:499330+yellow%0drno:100912521+yellow%0drno:25668+yellow%0drno:293504+yellow%0drno:290029+yellow%0drno:54410+yellow%0drno:293152+yellow%0drno:293615+yellow%0drno:81506+yellow%0drno:289095+yellow%0drno:310378+yellow%0drno:298653+yellow%0drno:300691+yellow%0drno:304539+yellow%0drno:309757+yellow%0drno:306840+yellow%0drno:298881+…	Metabolism of cofactors and vitamins	Metabolism	Aox1
1	Fatty acid degradation	KEGG PATHWAY	rno00071	1/32	46/8746	0.155534	0.215354	ENSRNOG00000032959	http://www.genome.jp/kegg-bin/show_pathway?map=rno00071&multi_query=rno:171155+yellow%0drno:94340+yellow%0drno:140547+yellow%0drno:117243+yellow%0drno:113965+tomato%0drno:291450+yellow%0drno:308100+yellow%0drno:308579+yellow%0drno:65183+yellow%0drno:170670+yellow%0drno:25363+yellow%0drno:171178+yellow%0drno:25014+yellow%0drno:24306+yellow%0drno:301120+yellow%0drno:266674+yellow%0drno:29740+yellow…	Lipid metabolism	Metabolism	Adh7
1	Tryptophan metabolism	KEGG PATHWAY	rno00380	1/32	50/8746	0.167892	0.215861	ENSRNOG00000015354	http://www.genome.jp/kegg-bin/show_pathway?map=rno00380&multi_query=rno:171385+yellow%0drno:113965+tomato%0drno:291450+yellow%0drno:308100+yellow%0drno:65183+yellow%0drno:170670+yellow%0drno:24248+yellow%0drno:25426+yellow%0drno:493909+yellow%0drno:65029+yellow%0drno:25014+yellow%0drno:298942+yellow%0drno:298483+yellow%0drno:681319+yellow%0drno:368066+yellow%0drno:100360621+yellow%0drno:29416+yel…	Amino acid metabolism	Metabolism	Aox1
1	Valine, leucine and isoleucine degradation	KEGG PATHWAY	rno00280	1/32	55/8746	0.183093	0.219712	ENSRNOG00000015354	http://www.genome.jp/kegg-bin/show_pathway?map=rno00280&multi_query=rno:367112+yellow%0drno:171155+yellow%0drno:24513+yellow%0drno:113965+tomato%0drno:291450+yellow%0drno:24450+yellow%0drno:688517+yellow%0drno:498962+yellow%0drno:65183+yellow%0drno:63864+yellow%0drno:170670+yellow%0drno:367196+yellow%0drno:81708+yellow%0drno:29611+yellow%0drno:25014+yellow%0drno:64304+yellow%0drno:29637+yellow%0d…	Amino acid metabolism	Metabolism	Aox1
1	Glycerolipid metabolism	KEGG PATHWAY	rno00561	1/32	62/8746	0.203924	0.229414	ENSRNOG00000009734	http://www.genome.jp/kegg-bin/show_pathway?map=rno00561&multi_query=rno:309014+yellow%0drno:313997+yellow%0drno:290843+yellow%0drno:192270+yellow%0drno:294324+yellow%0drno:25702+yellow%0drno:291450+yellow%0drno:406165+yellow%0drno:84028+yellow%0drno:291437+yellow%0drno:289481+yellow%0drno:140866+yellow%0drno:65183+yellow%0drno:24538+yellow%0drno:24539+yellow%0drno:170919+yellow%0drno:29653+yellow…	Lipid metabolism	Metabolism	Akr1b8
1	Vitamin B6 metabolism	KEGG PATHWAY	rno00750	1/32	11/8746	0.0395409	0.237245	ENSRNOG00000015354	http://www.genome.jp/kegg-bin/show_pathway?map=rno00750&multi_query=rno:493909+yellow%0drno:727679+yellow%0drno:64533+yellow%0drno:316424+yellow%0drno:293820+yellow%0drno:54349+yellow%0drno:316421+yellow%0drno:295663+yellow%0drno:83578+tomato%0drno:361819+tomato%0d	Metabolism of cofactors and vitamins	Metabolism	Aox1
1	Biosynthesis of unsaturated fatty acids	KEGG PATHWAY	rno01040	1/32	32/8746	0.110864	0.249445	ENSRNOG00000010468	http://www.genome.jp/kegg-bin/show_pathway?map=rno01040&multi_query=rno:503049+yellow%0drno:192272+yellow%0drno:362540+yellow%0drno:191576+yellow%0drno:171402+yellow%0drno:171400+yellow%0drno:83792+yellow%0drno:680115+yellow%0drno:498728+yellow%0drno:25541+yellow%0drno:102549542+yellow%0drno:83512+yellow%0drno:29725+yellow%0drno:84575+yellow%0drno:50681+yellow%0drno:679532+yellow%0drno:681337+yel…	Lipid metabolism	Metabolism	Elovl6
1	Fatty acid elongation	KEGG PATHWAY	rno00062	1/32	32/8746	0.110864	0.249445	ENSRNOG00000010468	http://www.genome.jp/kegg-bin/show_pathway?map=rno00062&multi_query=rno:171155+yellow%0drno:192272+yellow%0drno:362540+yellow%0drno:191576+yellow%0drno:113965+tomato%0drno:171402+yellow%0drno:54398+yellow%0drno:171400+yellow%0drno:170670+yellow%0drno:680115+yellow%0drno:498728+yellow%0drno:288058+yellow%0drno:29470+yellow%0drno:102549542+yellow%0drno:29411+yellow%0drno:679532+yellow%0drno:170465+…	Lipid metabolism	Metabolism	Elovl6
1	Porphyrin and chlorophyll metabolism	KEGG PATHWAY	rno00860	1/32	32/8746	0.110864	0.249445	ENSRNOG00000014117	http://www.genome.jp/kegg-bin/show_pathway?map=rno00860&multi_query=rno:499335+yellow%0drno:25709+yellow%0drno:24451+yellow%0drno:309070+yellow%0drno:24268+yellow%0drno:25748+yellow%0drno:266685+yellow%0drno:116599+yellow%0drno:289352+tomato%0drno:24434+yellow%0drno:289219+yellow%0drno:305264+yellow%0drno:361641+yellow%0drno:361338+yellow%0drno:309391+yellow%0drno:317444+yellow%0drno:83808+yellow…	Metabolism of cofactors and vitamins	Metabolism	Hmox1
1	Galactose metabolism	KEGG PATHWAY	rno00052	1/32	28/8746	0.0976869	0.251195	ENSRNOG00000009734	http://www.genome.jp/kegg-bin/show_pathway?map=rno00052&multi_query=rno:60416+yellow%0drno:289827+yellow%0drno:367562+tomato%0drno:25741+yellow%0drno:25058+yellow%0drno:25059+yellow%0drno:298003+yellow%0drno:296972+yellow%0drno:287835+yellow%0drno:116569+yellow%0drno:116463+yellow%0drno:24382+yellow%0drno:24385+yellow%0drno:363494+yellow%0drno:497756+yellow%0drno:313536+yellow%0drno:25060+yellow%…	Carbohydrate metabolism	Metabolism	Akr1b8
1	Glycolysis / Gluconeogenesis	KEGG PATHWAY	rno00010	1/32	76/8746	0.244053	0.258409	ENSRNOG00000032959	http://www.genome.jp/kegg-bin/show_pathway?map=rno00010&multi_query=rno:315722+yellow%0drno:266603+yellow%0drno:60416+yellow%0drno:100911625+yellow%0drno:316265+yellow%0drno:25059+yellow%0drno:291450+yellow%0drno:299052+yellow%0drno:24362+yellow%0drno:25741+yellow%0drno:289950+yellow%0drno:65183+yellow%0drno:311569+yellow%0drno:292804+yellow%0drno:25058+yellow%0drno:117098+yellow%0drno:24189+yell…	Carbohydrate metabolism	Metabolism	Adh7
1	Pentose and glucuronate interconversions	KEGG PATHWAY	rno00040	1/32	22/8746	0.0775653	0.279235	ENSRNOG00000009734	http://www.genome.jp/kegg-bin/show_pathway?map=rno00040&multi_query=rno:24434+yellow%0drno:289827+yellow%0drno:691002+yellow%0drno:83472+yellow%0drno:290277+yellow%0drno:266685+yellow%0drno:171408+yellow%0drno:296972+yellow%0drno:305264+yellow%0drno:116463+yellow%0drno:83808+yellow%0drno:154516+green%0drno:24788+yellow%0drno:316067+yellow%0drno:501157+yellow%0drno:83504+yellow%0drno:289533+yellow…	Carbohydrate metabolism	Metabolism	Akr1b8
1	Folate biosynthesis	KEGG PATHWAY	rno00790	1/32	27/8746	0.0943631	0.283089	ENSRNOG00000009734	http://www.genome.jp/kegg-bin/show_pathway?map=rno00790&multi_query=rno:25586+yellow%0drno:361300+yellow%0drno:301221+yellow%0drno:29244+yellow%0drno:24616+yellow%0drno:29224+yellow%0drno:296972+yellow%0drno:64192+yellow%0drno:64621+yellow%0drno:116463+yellow%0drno:29700+yellow%0drno:317675+yellow%0drno:687266+tomato%0drno:294753+yellow%0drno:29498+yellow%0drno:64845+yellow%0drno:100359675+yellow…	Metabolism of cofactors and vitamins	Metabolism	Akr1b8
1	AGE-RAGE signaling pathway in diabetic complications	KEGG PATHWAY	rno04933	1/32	101/8746	0.31089	0.31089	ENSRNOG00000007159	http://www.genome.jp/kegg-bin/show_pathway?map=rno04933&multi_query=rno:25584+yellow%0drno:103689932+yellow%0drno:81810+yellow%0drno:24887+yellow%0drno:24516+yellow%0drno:83571+yellow%0drno:29322+yellow%0drno:25031+yellow%0drno:24617+yellow%0drno:25233+yellow%0drno:24323+yellow%0drno:25464+yellow%0drno:94201+yellow%0drno:50689+yellow%0drno:83580+yellow%0drno:103694380+yellow%0drno:363458+yellow%0…	Endocrine and metabolic disease	Human Diseases	Ccl2
