# Supplementary material for: Nrf2 pathway activation promotes the expression of genes related to glutathione metabolism in alcohol-exposed astrocytes
Source: PeerJ. 2024 May 31;12:e17541. doi: 10.7717/peerj.17541 (PMC11146317; doi:10.7717/peerj.17541)
Supplement: Supplemental Information 5 [file peerj-12-17541-s005.xlsx]

## Sheet: Sheet1
	CON	ALC	TBHQ
△A	0.154	0.205	0.151
	0.175	0.191	0.153
	0.154	0.178	0.173
	0.184	0.187	0.161
	0.186	0.209	0.152
MDA contents(nmol/104 cell) = [∆A×V total volume÷(ε×d) ×109 ] ÷(500×V sample÷V extraction)= 0.1075×∆A
MDA contents	0.016555	0.0220375	0.0162325
	0.0188125	0.0205325	0.0164475
	0.016555	0.019135	0.0185975
	0.01978	0.0201025	0.0173075
	0.019995	0.0224675	0.01634
