# Supplementary material for: Nrf2 pathway activation promotes the expression of genes related to glutathione metabolism in alcohol-exposed astrocytes
Source: PeerJ. 2024 May 31;12:e17541. doi: 10.7717/peerj.17541 (PMC11146317; doi:10.7717/peerj.17541)
Supplement: Supplemental Information 6 [file peerj-12-17541-s006.xlsx]

## Sheet: Sheet1
F(Dilution ratio)=10
Percentage Inhibition＝( ΔA blank -ΔA Determination) ÷ΔA blank × 100%
SOD concentration =0.022×PI÷( 1-PI)×F
CON	ALC	TBHQ
0.16413	0.150682	0.178591
0.172902	0.140017	0.159192
0.159192	0.135983	0.197111
0.193768	0.161998	0.203094
0.185639	0.158497	0.228848
