# Supplementary material for: Nrf2 pathway activation promotes the expression of genes related to glutathione metabolism in alcohol-exposed astrocytes
Source: PeerJ. 2024 May 31;12:e17541. doi: 10.7717/peerj.17541 (PMC11146317; doi:10.7717/peerj.17541)
Supplement: Supplemental Information 7 [file peerj-12-17541-s007.xls]

## Sheet: Sheet1
ITEM TO CHECK	IMPORTANCE	CHECKLIST
EXPERIMENTAL DESIGN
Definition of experimental and control groups	E	MIQE supplementary materials
Number within each group	E	MIQE supplementary materials
Assay carried out by core lab or investigator's lab?	D
Acknowledgement of authors' contributions	D
SAMPLE
Description	E	MIQE supplementary materials
Volume/mass of sample processed	D
Microdissection or macrodissection	E	MIQE supplementary materials
Processing procedure	E	MIQE supplementary materials
If frozen - how and how quickly?	E	MIQE supplementary materials
If fixed - with what, how quickly?	E	MIQE supplementary materials
Sample storage conditions and duration (especially for FFPE samples)	E	MIQE supplementary materials
NUCLEIC ACID EXTRACTION
Procedure and/or instrumentation	E	MIQE supplementary materials
Name of kit and details of any modifications	E	MIQE supplementary materials
Source of additional reagents used	D
Details of DNase or RNAse treatment	E	MIQE supplementary materials
Contamination assessment (DNA or RNA)	E	MIQE supplementary materials
Nucleic acid quantification	E	MIQE supplementary materials
Instrument and method	E	MIQE supplementary materials
Purity (A260/A280)	D
Yield	D
RNA integrity method/instrument	E	MIQE supplementary materials
RIN/RQI or Cq of 3' and 5' transcripts	E	MIQE supplementary materials
Electrophoresis traces	D
Inhibition testing (Cq dilutions, spike or other)	E	MIQE supplementary materials
REVERSE TRANSCRIPTION
Complete reaction conditions	E	MIQE supplementary materials
Amount of RNA and reaction volume	E	MIQE supplementary materials
Priming oligonucleotide (if using GSP) and concentration	E	MIQE supplementary materials
Reverse transcriptase and concentration	E	MIQE supplementary materials
Temperature and time	E	MIQE supplementary materials
Manufacturer of reagents and catalogue numbers	D
Cqs with and without RT	D*
Storage conditions of cDNA	D
qPCR TARGET INFORMATION
If multiplex, efficiency and LOD of each assay.	E
Sequence accession number	E
Location of amplicon	D
Amplicon length	E
In silico specificity screen (BLAST, etc)	E
Pseudogenes, retropseudogenes or other homologs?	D
Sequence alignment	D
Secondary structure analysis of amplicon	D
Location of each primer by exon or intron (if applicable)	E
What splice variants are targeted?	E
qPCR OLIGONUCLEOTIDES
Primer sequences	E	MIQE supplementary materials
RTPrimerDB Identification Number	D
Probe sequences	D**
Location and identity of any modifications	E
Manufacturer of oligonucleotides	D
Purification method	D
qPCR PROTOCOL
Complete reaction conditions	E
Reaction volume and amount of cDNA/DNA	E
Primer, (probe), Mg++ and dNTP concentrations	E
Polymerase identity and concentration	E
Buffer/kit identity and manufacturer	E
Exact chemical constitution of the buffer	D
Additives (SYBR Green I, DMSO, etc.)	E
Manufacturer of plates/tubes and catalog number	D
Complete thermocycling parameters	E
Reaction setup (manual/robotic)	D
Manufacturer of qPCR instrument	E
qPCR VALIDATION
Evidence of optimisation (from gradients)	D
Specificity (gel, sequence, melt, or digest)	E
For SYBR Green I, Cq of the NTC	E
Standard curves with slope and y-intercept	E
PCR efficiency calculated from slope	E
Confidence interval for PCR efficiency or standard error	D
r2 of standard curve	E
Linear dynamic range	E
Cq variation at lower limit	E
Confidence intervals throughout range	D
Evidence for limit of detection	E
If multiplex, efficiency and LOD of each assay.	E
DATA ANALYSIS
qPCR analysis program (source, version)	E	MIQE supplementary materials
Cq method determination	E	MIQE supplementary materials
Outlier identification and disposition	E	MIQE supplementary materials
Results of NTCs	E	MIQE supplementary materials
Justification of number and choice of reference genes	E	MIQE supplementary materials
Description of normalisation method	E	MIQE supplementary materials
Number and concordance of biological replicates	D
Number and stage (RT or qPCR) of technical replicates	E	MIQE supplementary materials
Repeatability (intra-assay variation)	E
Reproducibility (inter-assay variation, %CV)	D
Power analysis	D
Statistical methods for result significance	E	MIQE supplementary materials
Software (source, version)	E
Cq or raw data submission using RDML	D
Table 1. MIQE checklist for authors, reviewers and editors. All essential information (E) must be submitted with the manuscript. Desirable
information (D) should be submitted if available. If using primers obtained from RTPrimerDB, information on qPCR target, oligonucleotides,
protocols and validation is available from that source.
*: Assessing the absence of DNA using a no RT assay is essential when first extracting RNA. Once the sample has been validated as
RDNA-free, inclusion of a no-RT control is desirable, but no longer essential.
**: Disclosure of the probe sequence is highly desirable and strongly encouraged. However, since not all commercial pre-designed assay
vendors provide this information, it cannot be an essential requirement. Use of such assays is advised against.
